# Supplementary material for: Neonicotinoid Clothianidin reduces honey bee immune response and contributes to Varroa mite proliferation
Source: PubMed Central journal article supplement (PMC7675992; doi:10.1038/s41467-020-19715-8), 2020-11-18
Supplement: 41467_2020_19715_MOESM1_ESM.pdf [file 41467_2020_19715_MOESM1_ESM.pdf]

## Supplementary Material

### Title

Neonicotinoid Clothianidin reduces honey bee immune response and contributes to *Varroa* mite proliferation

### Authors

Desiderato Annoscia, Gennaro Di Prisco, Andrea Becchimanzi, Emilio Caprio, Davide Frizzera, Alberto Linguadoca, Francesco Nazzi & Francesco Pennacchio

### Corresponding authors

Francesco Nazzi, [francesco.nazzi@uniud.it](mailto:francesco.nazzi@uniud.it)

Francesco Pennacchio, [f.pennacchio@unina.it](mailto:f.pennacchio@unina.it)

Supplementary figures

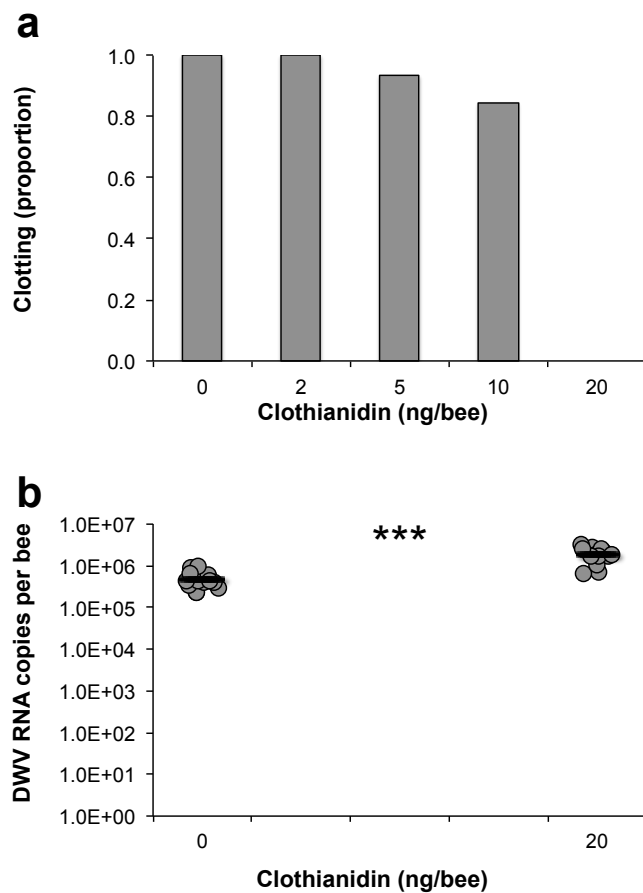

Supplementary Figure 1. **Effect of Clothianidin treatment on clotting and DWV infection level in adult bees.** **a** Clotting (Spearman's  $\rho=-0.975$ ,  $n=5$ ,  $P<0.05$ ). **b** DWV infection level (Mann-Whitney U test:  $n_1=15$ ,  $n_2=15$ ,  $U=4$ ,  $P<0.001$ ). Three replicates, of five honey bees each, were considered for each experimental condition; the horizontal bars in the scatter-jittered plot represent the sample average.

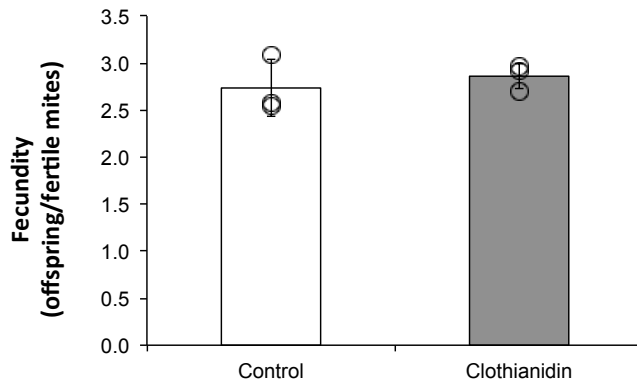

Supplementary Figure 2. **Fecundity (offspring per fertile female) of *Varroa* mites feeding on pupae treated or not with Clothianidin.** The experiment was run in triplicate, for a total of 78 (n=25+17+36 biologically independent mites) and 68 (n=23+14+31 biologically independent mites) individuals for Clothianidin treated and untreated controls, respectively; the offspring per fertile female in each replicate along with the average fecundity and relative standard deviation are reported.

Supplementary tables

Supplementary Table 1. Primers used for qRT-PCR analysis of DWV and immune genes.

| <b>Transcript</b> | <b>Sequence</b>                                          |
|-------------------|----------------------------------------------------------|
| DWV               | F: GCGCTTAGTGGAGGAAATGAA<br>R: GCACCTACGCGATGTAAATCTG    |
| Dorsal 1A         | F: ACAGGCAGAAGCTGAGAAGC<br>R: TTGCCATCGGATACAAGGAT       |
| Amel\102          | F: CAACTCCAGAATTGGAAATAGCA<br>R: TTTGCAATAGGAAAAGCAGTTG  |
| $\beta$ -actin    | F: GATTTGTATGCCAACACTGTCCTT<br>R: TTGCATTCTATCTGCGATTCCA |
| rps5              | F: AATTATTTGGTCGCTGGAATTG<br>R: TAACGTCCAGCAGAATGTGGTA   |
